# Supplementary material for: Resistance Evolution against Phage Combinations Depends on the Timing and Order of Exposure
Source: PubMed Central journal article supplement (PMC6759759; doi:10.1128/mbio.01652-19), 2019-09-24

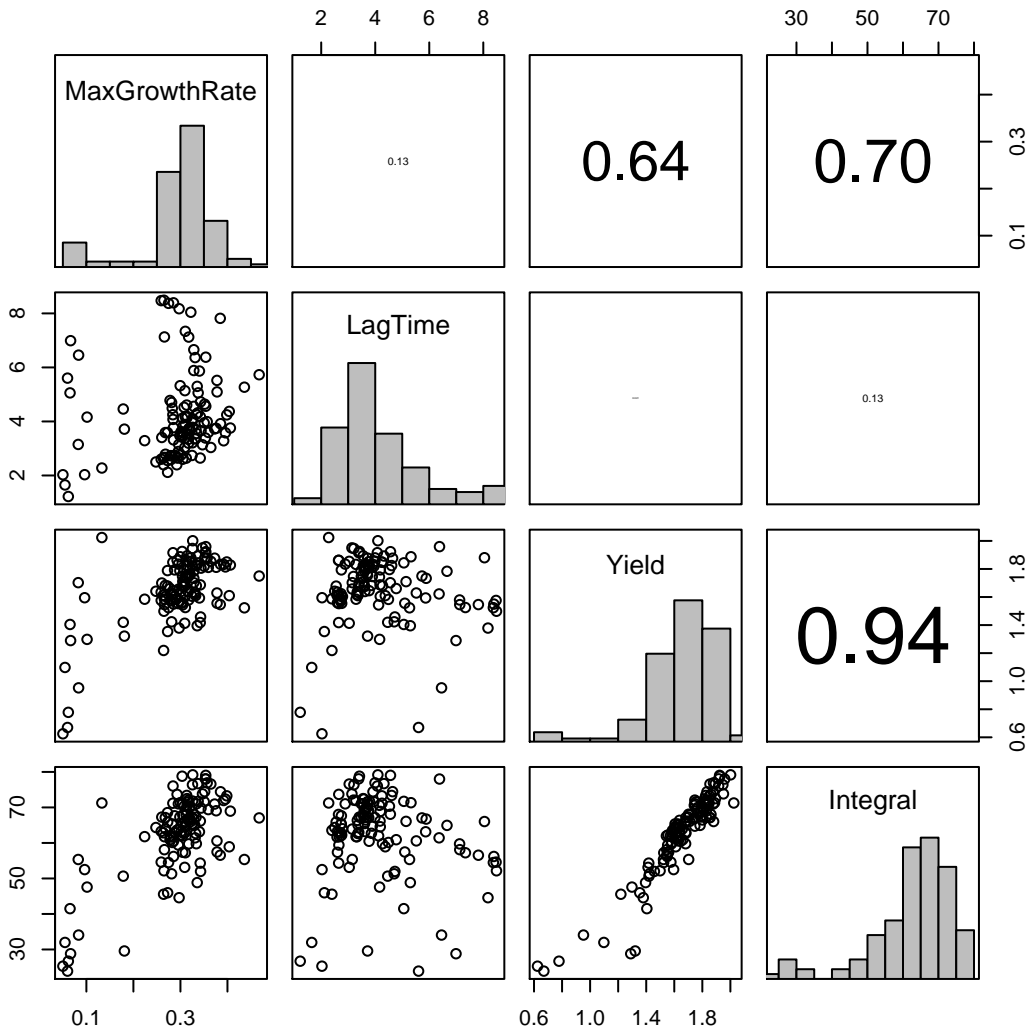

Supplement: mBio.01652-19-sf001.pdf [file mBio.01652-19-sf001.pdf]
