# Supplementary material for: Resistance Evolution against Phage Combinations Depends on the Timing and Order of Exposure
Source: PubMed Central journal article supplement (PMC6759759; doi:10.1128/mbio.01652-19), 2019-09-24
Supplement: mBio.01652-19-st001.pdf [file mBio.01652-19-st001.pdf]

| Category                   | Gene name                            | Operon/cluster                       | Gene product activity                               | Chromosome position (bp) | Effect type                           | Putative impact | Treatment     | Ancestor |
|----------------------------|--------------------------------------|--------------------------------------|-----------------------------------------------------|--------------------------|---------------------------------------|-----------------|---------------|----------|
| LPS biosynthesis           | galU                                 |                                      | UTP-glucose-1-phosphate uridylyltransferase         | 2215599-2215679          | deletion (80bp)                       | HIGH            | PA5P2->14/1   | PA01_FT2 |
|                            |                                      |                                      |                                                     | 2215816                  | stop gained                           | HIGH            | PA5P2->14/1   | PA01_FT1 |
|                            | PA5001 (Ssg)                         | PA5005-PA5004-PA5003-PA5002-PA5001   | cell-surface sugar biosynthetic glycosyltransferase | 5618765                  | frameshift                            | HIGH            | 14/1          | PA01_FT3 |
|                            |                                      |                                      |                                                     |                          |                                       |                 | 14/1->PA10P2  | PA01_FT3 |
|                            | PA5004 (wapH)                        | PA5005-PA5004-PA5003-PA5002-PA5001   | probable glycosyl transferase                       | 5622353-5622444          | deletion (91bp)                       | HIGH            | PA10P2->14/1  | PA01_FT3 |
|                            | rmlA                                 | rmlB-rmlD-rmlA-rmlC                  | glucose-1-phosphate thymidyltransferase             | 5812961                  | missense variant                      | MODERATE        | PA10P2        | PA01_FT3 |
|                            |                                      |                                      |                                                     |                          |                                       |                 | PA10P2->14/1  | PA01_FT3 |
|                            | wbpL                                 | wbp cluster                          | glycosyltransferase                                 | 3529218                  | frameshift                            | HIGH            | PA10P2+14/1   | PA01_FT2 |
|                            |                                      |                                      |                                                     |                          |                                       |                 | PA5P2+14/1    | PA01_FT2 |
|                            | wzy                                  | wbp cluster                          | LPS B-band O-antigen polymerase                     | 3538031                  | frameshift                            | HIGH            | PA10P2        | PA01_FT2 |
|                            |                                      |                                      |                                                     |                          |                                       | PA10P2->14/1    | PA01_FT2      |          |
|                            |                                      |                                      |                                                     |                          |                                       | PA10P2->PA5P2   | PA01_FT2      |          |
|                            |                                      |                                      | 3538428                                             | stop gained              | HIGH                                  | 14/1            | PA01_FT1      |          |
|                            |                                      |                                      |                                                     |                          |                                       | 14/1->PA5P2     | PA01_FT1      |          |
|                            |                                      |                                      |                                                     |                          |                                       | 14/1->PA10P2    | PA01_FT1      |          |
|                            |                                      |                                      | 3538499                                             | frameshift               | HIGH                                  | 14/1            | PA01_FT2      |          |
|                            |                                      |                                      |                                                     |                          |                                       | 14/1->PA5P2     | PA01_FT2      |          |
|                            |                                      |                                      |                                                     |                          |                                       | 14/1->PA10P2    | PA01_FT2      |          |
|                            |                                      |                                      |                                                     |                          |                                       | PA5P2->PA10P2   | PA01_FT1      |          |
|                            |                                      |                                      | 3538988                                             | frameshift               | HIGH                                  | PA10P2          | PA01_FT1      |          |
|                            |                                      |                                      |                                                     |                          |                                       | PA10P2+14/1     | PA01_FT3      |          |
|                            |                                      |                                      |                                                     |                          |                                       | PA5P2->14/1     | PA01_FT3      |          |
|                            |                                      |                                      |                                                     |                          |                                       | PA5P2->PA10P2   | PA01_FT2      |          |
|                            |                                      |                                      |                                                     |                          |                                       | PA5P2->PA10P2   | PA01_FT3      |          |
|                            |                                      |                                      |                                                     |                          |                                       | PA5P2+PA10P2    | PA01_FT3      |          |
|                            |                                      |                                      |                                                     |                          |                                       | PA5P2+PA10P2    | PA01_FT2      |          |
|                            |                                      |                                      |                                                     |                          |                                       | PA10P2->14/1    | PA01_FT1      |          |
|                            |                                      |                                      |                                                     |                          |                                       | PA10P2->PA5P2   | PA01_FT1      |          |
| Type IV pilus biosynthesis | pilB                                 |                                      | motor protein - pilus extension                     | 5070925                  | missense variant                      | MODERATE        | PA5P2         | PA01_FT3 |
|                            |                                      |                                      |                                                     |                          |                                       |                 | PA5P2->14/1   | PA01_FT3 |
|                            |                                      |                                      |                                                     |                          |                                       |                 | PA5P2->PA10P2 | PA01_FT3 |
|                            |                                      |                                      |                                                     |                          |                                       |                 | PA10P2->PA5P2 | PA01_FT1 |
|                            | pilE                                 | fimU-pilV-pilW-pilX-pilY1-pilY2-pilE | minor pilin                                         | 5104842                  | conservative inframe insertion (12bp) | MODERATE        | 14/1->PA5P2   | PA01_FT1 |
|                            | pilN                                 | pilM-pilN-pilO-pilP-pilQ             | type IV pilus assembly protein                      | 5679190                  | missense variant                      | MODERATE        | PA5P2         | PA01_FT2 |
|                            |                                      |                                      |                                                     |                          |                                       |                 | PA5P2->14/1   | PA01_FT2 |
|                            |                                      |                                      |                                                     |                          |                                       | PA5P2->PA10P2   | PA01_FT2      |          |
| pilR                       | pilS-pilR                            | two-component response regulator     | 5095672                                             | missense variant         | MODERATE                              | PA5P2           | PA01_FT1      |          |
|                            |                                      |                                      |                                                     |                          |                                       | PA5P2->14/1     | PA01_FT1      |          |
|                            |                                      |                                      |                                                     |                          |                                       | PA5P2->PA10P2   | PA01_FT1      |          |
| pilT+pilU                  |                                      | twitching motility proteins          | 437058-438250                                       | deletion (1,192bp)       | HIGH                                  | 14/1->PA5P2     | PA01_FT2      |          |
| pilY1                      | fimU-pilV-pilW-pilX-pilY1-pilY2-pilE | putative anti-retraction factor      | 5101958                                             | stop gained              | HIGH                                  | PA10P2->PA5P2   | PA01_FT2      |          |
|                            |                                      |                                      | 5103165                                             | frameshift               | HIGH                                  | PA10P2+14/1     | PA01_FT1      |          |
| Other gene variations      | PA0142-nuh                           |                                      |                                                     | 163275                   | intergenic                            | MODIFIER        | PA10P2+14/1   | PA01_FT3 |
|                            | PA0429                               |                                      | predicted Nucleotide-diphospho-sugar transferase    | 480379                   | missense variant                      | MODERATE        | PA10P2->14/1  | PA01_FT2 |
|                            |                                      |                                      |                                                     | 480952                   | stop gained                           | HIGH            | PA10P2->14/1  | PA01_FT1 |
|                            | PA0845-PA0846                        |                                      | intergenic                                          | 923945                   | intergenic                            | MODIFIER        | PA5P2->PA10P2 | PA01_FT2 |
|                            | PA1065                               |                                      | unknown                                             | 1151442                  | missense variant                      | MODERATE        | PA10P2+14/1   | PA01_FT3 |
|                            | PA1567                               |                                      | predicted oxidation-reduction activity              | 1709197                  | conservative inframe insertion (6bp)  | MODERATE        | PA5P2->14/1   | PA01_FT3 |
|                            | PA3722-PA3723                        |                                      |                                                     | 4167572                  | intergenic                            | MODIFIER        | PA10P2+14/1   | PA01_FT1 |
|                            | PA4278                               | birA-PA4279-PA4278                   | inferred sporulation-related domain                 | 4786538                  | missense variant                      | MODERATE        | PA5P2         | PA01_FT3 |
|                            |                                      |                                      |                                                     |                          |                                       | PA5P2->14/1     | PA01_FT3      |          |
|                            |                                      |                                      |                                                     |                          |                                       | PA5P2->PA10P2   | PA01_FT3      |          |
| Other                      |                                      |                                      |                                                     | 3651299-3651424          | Duplication and insertion             |                 | PA5P2+PA10P2  | PA01_FT3 |
|                            |                                      |                                      |                                                     |                          |                                       |                 | PA5P2+PA10P2  | PA01_FT1 |
|                            |                                      |                                      |                                                     | 4746797-4747035          | Duplication and insertion             |                 | PA5P2+PA10P2  | PA01_FT3 |
|                            |                                      |                                      |                                                     |                          |                                       |                 | PA5P2+PA10P2  | PA01_FT1 |
|                            |                                      |                                      |                                                     | 2194891-2445323          | large deletion (>250 kb)              |                 | PA10P2+14/1   | PA01_FT1 |

**Supplementary Table 1. Identity and function of genes where mutations were identified**
